# Supplementary material
Source: Elsevier journal article supplement (https://comptes-rendus.academie-sciences.fr/physique/article/10.1016/j.crhy.2018.09.008/file/attach/mmc1.pdf)
Supplement: mmc1 [file mmc1.pdf]

# The reactivity of pigments composed of chromium in a porcelain glaze

Louisiane Verger, Olivier Dargaud, Gwenaëlle Rouse, Laurent Cormier

## Supporting information

### 1. Analytical methods

X-ray powder diffraction (XRD) data were collected using a PANalytical X'Pert PRO diffractometer with Cu K $\alpha$  radiations ( $\lambda_{\text{Cu,K}\alpha 1} = 1.54056 \text{ \AA}$ ,  $\lambda_{\text{Cu,K}\alpha 2} = 1.54439 \text{ \AA}$ ). XRD patterns for the pigments were measured on powdered samples, between  $5^\circ$  and  $130^\circ$ , with a step of  $0.008^\circ$   $2\theta$  and a counting time of 25 s/step. For the glazes, XRD patterns were measured without specific preparation, between  $10^\circ$  and  $130^\circ$ , with a step of  $0.016^\circ$   $2\theta$  and a counting time of 550 s/step. Rietveld and LeBail refinements were carried out using the FullProf Suite program<sup>1</sup>.

Diffuse reflectance spectra were recorded using a Perkin Elmer Lambda 1050 spectrometer equipped with an integrating sphere, between 4000 and  $36,000 \text{ cm}^{-1}$ . The pigments were finely ground and the powdered samples were deposited on a support. A perfectly flat tablet of BaSO<sub>4</sub> was used as a white reference material. A Kubelka-Munk conversion applied to a diffuse reflectance spectrum enables to obtain the absorption spectrum<sup>2</sup>.

Cross sections were cut from the porcelain shard with the glaze on the top. These fragments were embedded in a resin block, polished using diamond pastes down to  $3 \mu\text{m}$  and carbon coated. Scanning electron microscopy (SEM) analyses were conducted with a Zeiss Ultra55 (Oberkochen, Germany), with an acceleration voltage of 15 keV, a working distance of 7.5 mm and a backscattered electron detector, associated with an X-ray Energy Dispersive Spectroscopy (XEDS) microprobe.

Electron transparent foils were prepared using Focused Ion Beam (FIB) on a FEI STRATA DB235 instrument. Sections were analyzed with a JEOL 2100F microscope operating at 200 kV. This microscope was equipped with a field emission gun, an ultra-high resolution (UHR) pole piece and a scanning TEM (STEM) device, which allowed Z-contrast imaging in the high angle annular dark field (STEM-HAADF) mode. Chemical analyses were performed using a JEOL detector with an ultrathin window by XEDS elemental mapping in the STEM-XEDS mode. Selected area electron diffraction (SAED) patterns were acquired along two or three zone axis to identify unambiguously the structure of the crystal.

X-ray absorption near edge structure (XANES) spectra at the Cr K-edge were collected on the LUCIA beamline at the SOLEIL synchrotron facility in Saint-Aubin (France). The synchrotron operated with a storage ring current of 450 mA and an energy of 2.75 GeV. The layout of the LUCIA beamline is described in Vantelon et al.<sup>3</sup> XANES spectra were collected using an

Si(311) double crystal monochromator. The monochromator was calibrated against the maximum intensity of the first inflection of the first derivative of a metallic Cr standard (5989 eV). XANES measurements were performed in the energy range 5940 eV to 6200 eV. The energy steps were fixed to 2, 0.05, 0.2, 0.5 and 1 eV for energy ranges of [5940 - 5983] eV, [5983 - 5999] eV, [5999 to 6040] eV, [6040 - 6120] eV and [6120 - 6200] eV, respectively. Spectra were collected under vacuum at room temperature (around  $10^{-2}$  mbar), in X-ray fluorescence mode using a 4-elements Silicon Drift Diode detector. Powdered samples (reference of  $\text{Cr}_2\text{O}_3$ , pigments 10100 and 10059) were pressed into pellets and were mounted on carbon tape. Two to four spectra were recorded for each sample with a counting time of about 1s per step. Multiple Cr K-edge XANES spectra recorded for each sample were merged to obtain average spectra before background subtraction and normalisation using the ATHENA software<sup>4</sup>.

## 2. Solid solution $\text{CoAl}_2\text{O}_4$ - $\text{CoCr}_2\text{O}_4$

The two end-members of the solid solution, i.e  $\text{CoAl}_2\text{O}_4$  and  $\text{CoCr}_2\text{O}_4$ , were first synthesised. Reagent-grade chemicals  $\text{CoO}$ ,  $\gamma\text{-Al}_2\text{O}_3$  and  $\text{Cr}_2\text{O}_3$  were weighted in the right stoichiometric proportions, mixed, ground in an agate mortar with ethanol and calcined in a platinum crucible at 1400 °C during 20 hours. Then, using the same procedure, nine compounds in the solid solutions  $\text{CoAl}_{2-x}\text{Cr}_x\text{O}_4$  with  $x$  from 0.2 to 1.8 were synthesised from the end-members. The color of the sample varies from blue ( $\text{CoAl}_2\text{O}_4$ ) to greenish-blue ( $\text{CoCr}_2\text{O}_4$ ).

XRD diagrams acquired on each sample show the formation of a single spinel phase (figure S-1). Lattice parameter  $a$  was calculated by Le Bail refinement of the XRD pattern and plotted as a function of the Cr content  $x$  in the  $\text{CoAl}_{2-x}\text{Cr}_x\text{O}_4$  series (figure S-2). A gradual increase in the lattice parameter is observed when substituting Al by Cr. A linear regression points out that this solid solution obeys Vegard's law with the following equation:  $a$  (Å) = 0.1153  $x$  + 8.107 (Å). The lattice parameter found for  $\text{CoAl}_2\text{O}_4$  is consistent with results previously reported in the literature<sup>5</sup>.

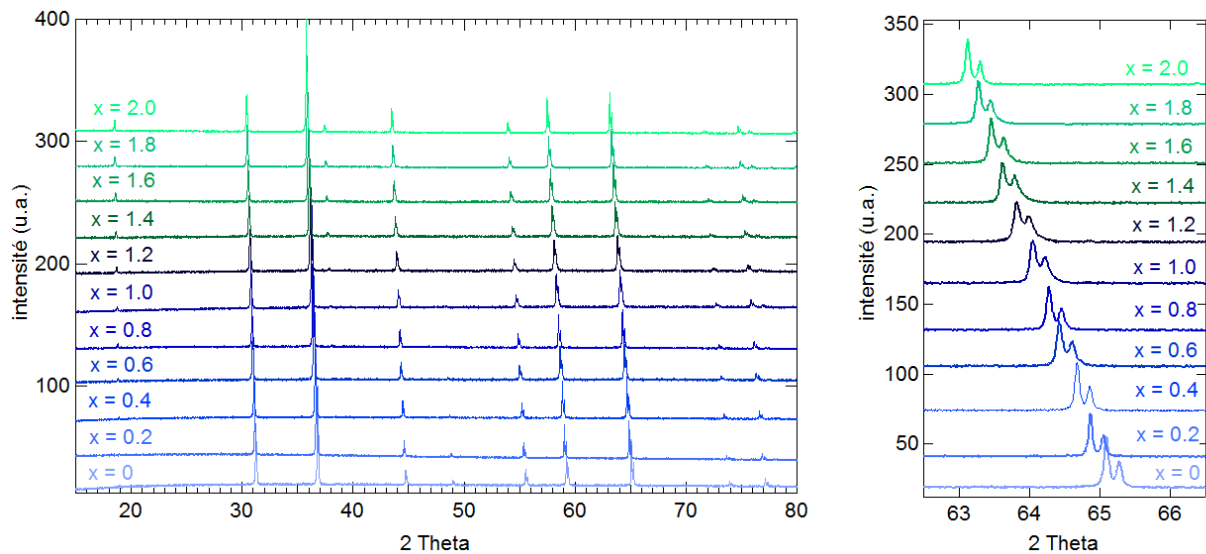

Figure S-1: XRD patterns of the samples  $\text{CoAl}_{2-x}\text{Cr}_x\text{O}_4$  with  $x$  between 0 and 2. The linear shift towards lower  $2\theta$  with the increase of chromium content  $x$  is due to the linear increase of the lattice parameters.

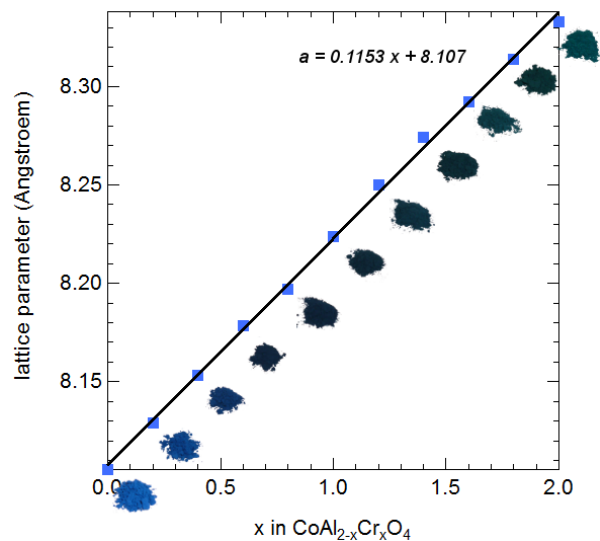

Figure S-2: In blue, variation of the cubic lattice parameters  $a$  of  $\text{CoAl}_{2-x}\text{Cr}_x\text{O}_4$  calculated with Rietveld refinements as a function of the chromium concentration  $x$ ; in black the linear regression; for each composition the pictures of the powders is on the right.

### 3. Modification of the thermal treatment applied on glaze g-10100

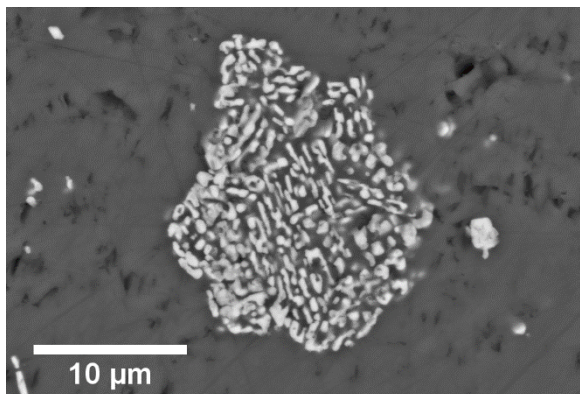

Figure S-3: SEM image (signal ASB, EHT=15 kV) of a representative grain of pigment in g-10100 fired at 1280°C during 15 hours.

### 3. References

1. Rodríguez-Carvajal, J. Recent advances in magnetic structure determination by neutron powder diffraction. *Phys. B Condens. Matter* **192**, 55–69 (1993).
2. Kubelka, P. & Munk, F. Ein Beitrag zur Optik der Farbanstriche. *Z. Tech. Phys.* 593–601 (1931).
3. Vantelon, D. *et al.* The LUCIA beamline at SOLEIL. *J. Synchrotron Radiat.* **23**, 635–640 (2016).
4. Ravel, B. & Newville, M. ATHENA, ARTEMIS, HEPHAESTUS: data analysis for X-ray absorption spectroscopy using IFEFFIT. *J. Synchrotron Radiat.* **12**, 537–541 (2005).
5. D’Ippolito, V., Andreozzi, G. B., Bosi, F. & Halenius, U. Blue spinel crystals in the  $\text{MgAl}_2\text{O}_4\text{-CoAl}_2\text{O}_4$  series: Part I. Flux growth and chemical characterization. *Am. Mineral.* **97**, 1828–1833 (2012).
